# Supplementary material
Source: PubMed Central journal article supplement (PMC3902643)
Supplement: NIHMS545142-supplement-01.pdf [file NIHMS545142-supplement-01.pdf]

**Suppl Mat 1: Pooling of samples for the miRNome qPCR arrays**

| Group | ID | Age | AVG age | Sex | Race | BMI  |
|-------|----|-----|---------|-----|------|------|
| 1     | 1  | 34  | 37.5    | M   | AA   | 23.1 |
|       | 2  | 38  |         | M   | W    | 20.5 |
|       | 3  | 48  |         | M   | W    | N/A  |
|       | 4  | 30  |         | M   | W    | N/A  |
| 2     | 5  | 35  | 32.25   | F   | W    | 27.1 |
|       | 6  | 40  |         | F   | W    | 21.2 |
|       | 7  | 27  |         | F   | W    | 21.8 |
|       | 8  | 27  |         | F   | AA   | 34.7 |
| 3     | 9  | 51  | 49      | F   | AA   | 26   |
|       | 10 | 49  |         | F   | W    | 26.2 |
|       | 11 | 52  |         | F   | W    | 26.3 |
|       | 12 | 44  |         | F   | W    | 25.1 |
| 4     | 13 | 20  | 21.8    | F   | W    | 24   |
|       | 14 | 22  |         | F   | W    | 26.8 |
|       | 15 | 22  |         | F   | W    | 22   |
|       | 16 | 25  |         | F   | AA   | 30.5 |
|       | 17 | 20  |         | F   | W    | 24   |

M-male, F- female, AA- african-american, W- white

BMI- body mas index
