# Supplementary material
Source: PubMed Central journal article supplement (PMC3902643)
Supplement: NIHMS545142-supplement-05.pdf [file NIHMS545142-supplement-05.pdf]

**Suppl Mat 4: Predicted gene targets of the 4 commonly regulated miRNAs by GAL and RL**

| <b>miR-129-3p</b> | <b>miR-146b-5p</b> | <b>miR-550a</b> | <b>miR-543</b> |
|-------------------|--------------------|-----------------|----------------|
| TMEM136           | TRAF6              | MEF2A           | AASDHPPT       |
| MEMO1             | NOVA1              | ADCY1           | ABCA1          |
| RCHY1             | SRSF6              | OSBPL8          | ABCB11         |
| HS2ST1            | ZNF90              | SAMD12          | ABHD12B        |
| CCP110            | ZNF506             | ZNF705A         | ABHD13         |
| EGLN3             | ZNF253             | BCL11B          | ABRA           |
| SLC24A2           | RHOBTB3            | BRD1            | ACBD3          |
| C10orf47          | MRS2               | ACBD3           | ACTL6A         |
| BAALC             | KDM2B              | MTMR7           | ACTR10         |
| PASK              | IRAK1              | SHISA2          | ACVR1C         |
| ENOSF1            | EIF4G2             | STK35           | ACVR2A         |
| LHFP              | PTAR1              | JRKL            | ACVR2B         |
| LHFPL2            | WWC2               | HTR5A           | ACYP1          |
| CDCA7L            | ZBTB2              | SLCO3A1         | ACSL1          |
| MYEF2             | SMAD4              | KL              | ADAM12         |
| USP25             | ITCH               | ATP1A2          | ADAM9          |
| DCUN1D3           | STRBP              | ZCCHC10         | ADAMTSL1       |
| TCF7              | C9orf30            | LRRC27          | ADARB2         |
| SH3TC2            | TMEM185B           | TIMP2           | ADAT2          |
| FAM155A           | PSMD3              | CX3CR1          | ADCK3          |
| AIF1L             | DIS3L              | CSNK1A1         | AGFG1          |
| STX6              | ST7L               | ADCYAP1         | AGL            |
| PTAR1             | HDAC8              | GPR39           | AHCTF1         |
| PDE10A            | CLASP2             | PCDH18          | AK3            |
| MYO1B             | HNRNPD             | TMEM151B        | AKAP11         |
| KPNA4             | DDHD1              | DPYSL5          | AKAP5          |
| HECTD1            | MRCH1              | PTGR2           | AKAP6          |
| ARAP2             | SEC23IP            | KCNQ5           | AKAP7          |
| NMNAT2            | SYT14              | MKRN1           | ALG10B         |
| RAB31             | SPT14              | LY75-CD302      | ALG6           |
| MAP2K4            | PCDH1              | WTAP            | ALG9           |
| HNRNPA3           | FMNL3              | CD302           | AMFR           |
| GGPS1             | KIAA1244           | CHST6           | ANAPC16        |
| XKR4              | ZFAND5             | CHD7            | ANGPT2         |
| CSRP1             | MLLT1              | ADPRH           | ANKFY1         |
| OSBPL10           | MTPAP              | KCNMB4          | ANKRD13C       |
| DGKI              | TIMELESS           | ZNF417          | ANKRD20A3      |
| FRYL              | USP3               | TSHZ3           | ANKRD50        |
| VPS13B            | CRAMP1L            | ZNF587          | ANKS1B         |
| NFATC2IP          | ZDHHC13            | KCNE1           | ANO5           |
| CHML              | RAB8B              | SYNPO2          | ANP32A         |

|           |              |          |          |
|-----------|--------------|----------|----------|
| SCD5      | TRIM66       | ESYT2    | ARF6     |
| BAG3      | PRMT3        | SCARA3   | ARFGEF2  |
| PIK3IP1   | ACTBL2       | MAN1A1   | ARHGAP18 |
| MEF2A     | LCOR         | GLIS3    | ARHGAP26 |
| SCN3B     | ONECUT2      | RGS6     | ARHGAP29 |
| RTN3      | MED1         | NT5DC3   | ARHGEF26 |
| MLLT6     | ZNF354B      | PSME1    | ARHGEF3  |
| DYRK3     | ZNF257       | RNF43    | ARIH1    |
| PKIA      | TSPYL1       | SOCS4    | ARL4A    |
| KLHL28    | CCK          | ZNF185   | ARL5A    |
| NRK       | TDRKH        | CCDC3    | ARL5B    |
| ACADM     | YES1         | STX16    | ARL6IP6  |
| PNISR     | UPP2         | MTCH2    | ARNT2    |
| MTHFD2L   | ZNF540       | ADAMTSL5 | ARRDC4   |
| MRPS25    | PSMF1        | OXNAD1   | ASAP2    |
| SYTL5     | PID1         | CD1C     | ASPH     |
| SNRPE     | C16orf72     | IL23R    | ATG2B    |
| KIAA0182  | ARFGAP3      | CDC42SE2 | ATG4B    |
| ARHGAP31  | ARF6         | TRIM44   | ATG5     |
| MAN1A1    | STIL         | SYT7     | ATL2     |
| RRM2B     | PHKB         | ADAMTS6  | ATM      |
| GABRG1    | TOR1A        | SUMO3    | ATP11B   |
| KIDINS220 | TBX18        | CRCP     | ATP1B1   |
| CYP27C1   | TMEM19       | MPPED2   | ATP1B4   |
| TOMM20    | LRCH1        | PDGFRA   | ATP2B1   |
| UNK       | FOXR2        | HUNK     | ATP6V1A  |
| KDM3B     | CTAGE9       | C5orf20  | ATP6V1C2 |
| POP1      | C3orf38      | TEC      | ATRNL1   |
| HSPH1     | LANCL1       | CLIC2    | ATXN1    |
| GFOD1     | RACGAP1      | DYRK1A   | ATXN3    |
| C2orf88   | BCORL1       | C22orf25 | ATXN7    |
| SCARF1    | WDR7         | GLT25D1  | B3GALT   |
| CBX6      | IGSF1        | EXPH5    | B3GNT5   |
| ELOVL2    | ZNF555       | CXCR1    | B4GALT6  |
| LMOD3     | ARL17A       | C1QTNF2  | BACH2    |
| C14orf28  | C7orf57      | DSTN     | BAI3     |
| FCRL5     | USP47        | BCCIP    | BANK1    |
| NPTN      | LOC100294341 | COL19A1  | BAZ2B    |
| BDKRB2    | SLC19A3      | CENPO    | BEND7    |
| TMEM161B  | MARK1        | ABCG4    | BET1     |
| CAMKK2    | UMPS         | DENND4C  | BEX2     |
| ACAP2     | CCDC89       | PAPOLA   | BHMT2    |
| CDS1      | MS4A1        | ZNF480   | BIRC6    |
| PPP6C     | KLHL4        | ARSB     | BMP2K    |

|              |         |               |           |
|--------------|---------|---------------|-----------|
| CCR6         | PPM1K   | GP1BA         | BRAP      |
| GOLPH3L      | SRPRB   | NFIC          | BRD1      |
| GLT25D2      | CTAGE4  | NGEF          | BRWD1     |
| IL17A        | UBR5    | PAQR9         | BTRC      |
| ACAD8        | TBC1D20 | GHITM         | BUB3      |
| FAM120AOS    | PLSCR4  | HIF3A         | C10orf112 |
| E2F5         | PHF20L1 | ZNF24         | C11orf53  |
| HOMER2       | IER5L   | CXADR         | C12orf34  |
| SPCS3        | CDS1    | KRTAP20-3     | C12orf66  |
| STRN         | CD96    | P2RY14        | C14orf129 |
| LOC100289187 | TRMT1L  | CCDC69        | C14orf135 |
| JPH4         | AGMAT   | NPL           | C14orf43  |
| KLHL13       | RFX7    | FBXO18        | C15orf2   |
| EIF2AK3      | FBXW2   | FXN           | C15orf29  |
| RFX3         | CASK    | C3orf17       | C15orf48  |
| FAM206A      | BZW1    | HOOK3         | C16orf72  |
| POTEC        | RUNDC3B | APOL6         | C17orf39  |
| GNRHR        | DLGAP2  | TTC39C        | C17orf51  |
| PLN          | ENTPD1  | ERBB2IP       | C17orf57  |
| FGFR10P2     | CREBL2  | SUZ12         | C19orf12  |
| DYNLL2       | OR9Q1   | GCNT4         | C19orf42  |
| ILDR2        | THAP5   | NAA38         | C1orf27   |
| CPSF2        | LIN7C   | EPGN          | C1orf52   |
| CAMLG        | ZNF229  | TBC1D2B       | C20orf111 |
| FAM36A       | TBRG1   | MYH2          | C21orf91  |
| KIAA1217     | C9orf72 | GSPT1         | C2orf43   |
| TDRD6        | CCDC117 | PTGDR2        | C2orf66   |
| TMF1         | SLC1A1  | ZAK           | C2orf68   |
| C17orf58     | ERV3-1  | RAP1GAP2      | C2orf80   |
| PRKCE        | LRRTM2  | MDGA2         | C3orf55   |
| VSIG10L      | FTCD    | C22orf46      | C4orf43   |
| LITAF        | GCFC2   | DDX52         | C5AR1     |
| ZNF639       | ZC3H12B | PROSC         | C5orf13   |
| HHAT         | ZNF605  | ZNF704        | C5orf30   |
| MAP3K1       | ZNF662  | KIAA1549      | C5orf41   |
| ZNF507       | RAC1    | C8orf48       | C5orf47   |
| STARD4       | TMX3    | C3orf27       | C7orf57   |
| EIF3J        | MTAP    | WIPF3         | C8orf59   |
| F5           | SRP72   | BPGM          | C8orf84   |
| PDCD2        | IQGAP3  | SPATA13       | C9        |
| SUPT7L       | CD80    | PLD1          | C9orf71   |
| TNFRSF11A    | BRK1    | SYNJ2BP-COX16 | CACHD1    |
| RIMS1        | CFH     | COX16         | CACNB2    |
| PAIP1        | SLC38A1 | CCR2          | CACNB4    |

|           |              |  |         |
|-----------|--------------|--|---------|
| RAB8B     | PLEKHM3      |  | CALB1   |
| FAM185A   | LOC644704    |  | CAND1   |
| ZNF350    | LOC100287723 |  | CAPRIN1 |
| LARGE     | CSE1L        |  | CARD8   |
| VPS53     | PQLC3        |  | CASK    |
| GABRA1    | POFUT2       |  | CC2D2B  |
| THEMIS    | ESYT2        |  | CCAR1   |
| HNRNPU    | TRAK2        |  | CCBE1   |
| RDH10     | GJC1         |  | CCDC117 |
| KRT74     | SIX4         |  | CCDC126 |
| TRIB1     | MRPS14       |  | CCDC165 |
| ACSBG1    | NSL1         |  | CCDC42  |
| FOPNL     | TRIM5        |  | CCDC75  |
| UCHL5     | ZNF331       |  | CCDC88C |
| TMTC1     | MOB1B        |  | CCDC90A |
| PRPF39    | WISP1        |  | CCL22   |
| MTF1      | RAB7L1       |  | CCNF    |
| ZNF436    | DTWD2        |  | CCR6    |
| BNIP3L    | CNTF         |  | CD163   |
| HSPA9     | SORT1        |  | CD2AP   |
| RFX7      | TRIM37       |  | CD302   |
| RAP1B     | KIAA1199     |  | CDH2    |
| NUCKS1    | RBM11        |  | CDH6    |
| SMAD3     | BHLHE41      |  | CDK1    |
| SNTN      | JAZF1        |  | CDK14   |
| RHOA      | ZNF813       |  | CDK6    |
| NFAT5     | KCNJ16       |  | CDS2    |
| KL        | FNBP4        |  | CEBPG   |
| GPD1      | LOC400682    |  | CEP85L  |
| C1orf141  | HMBOX1       |  | CER1    |
| PTGER4    | ZNF117       |  | CERS3   |
| CAMK1G    | RPL34        |  | CGGBP1  |
| CXCL6     | OPALIN       |  | CHCHD7  |
| BIRC6     | SLC16A14     |  | CHML    |
| C9orf69   | SLC10A3      |  | CHN1    |
| USP13     | FBXO3        |  | CHN2    |
| CEP63     | AQP9         |  | CLEC12A |
| GFRA1     | KRTAP1-5     |  | CLMN    |
| GJA5      | ARSB         |  | CLOCK   |
| CCDC102B  | FZD3         |  | CMPK1   |
| C10orf118 | DTNA         |  | CNNM2   |
| RCAN2     | PPP2R5C      |  | CNOT1   |
| ARL6IP1   | MPO          |  | CNTN5   |
| MCU       | PMAIP1       |  | CNTNAP3 |

|          |              |  |            |
|----------|--------------|--|------------|
| ATP5G3   | SPIN4        |  | CNTNAP3B   |
| HEATR1   | ZNF138       |  | COL16A1    |
| TIAM1    | PPBP         |  | COL1A2     |
| RNF8     | FAM210A      |  | COMMD2     |
| CALN1    | LOC100509263 |  | COPS2      |
| DIXDC1   | DCAF5        |  | COX11      |
| GNA13    | SCN3B        |  | CP         |
| C18orf42 | FAM26E       |  | CPD        |
| KLHL20   | C4orf3       |  | CPEB2      |
| CDK1     | IBA57        |  | CPSF6      |
| AMFR     | IQGAP1       |  | CREB1      |
| PFKFB2   | NOTCH2       |  | CREB5      |
| MED1     | IFIT3        |  | CREBL2     |
| MUTED    | SDHC         |  | CREBZF     |
| GPD1L    | SYNJ2        |  | CRH        |
| TRAF3IP1 | VPS54        |  | CRHBP      |
| MCM8     | ZNF558       |  | CTBS       |
| CHRNA2   | KIAA1715     |  | CTDSPL     |
| GCOM1    | FBXO4        |  | CTNNA1     |
| FADS1    | BRCA2        |  | CTTNBP2NL  |
| PTPN3    | PRKCE        |  | CUL3       |
| NPTXR    | DPY19L2      |  | CXorf23    |
| ZCRB1    | TRDMT1       |  | CXorf30    |
| USP32    | CASR         |  | CYB561D1   |
| BEAN1    | AMPH         |  | CYB5R4     |
| LPAR3    | NRAS         |  | CYP26B1    |
| AK4      | RHOXF2B      |  | CYR61      |
| SPEF2    | PAQR9        |  | CSGALNACT2 |
| SHISA3   | ZNF649       |  | CSRNP3     |
| VEZT     | LRP2         |  | DAD1       |
| GOLT1B   | PTPRE        |  | DAZ1       |
| GRIN2D   | LPGAT1       |  | DAZ2       |
| PKN2     | LRRC15       |  | DAZ3       |
| AFF1     | FAF2         |  | DAZ4       |
| ALKBH1   | RPS6KA6      |  | DBX2       |
| FAM210B  | KIAA1161     |  | DCAF11     |
| HCN1     | ZNF449       |  | DCLK1      |
| ADAM8    | CLCN6        |  | DCP2       |
|          | KIAA1826     |  | DCUN1D1    |
|          | PLEKHA8      |  | DDHD1      |
|          | RASGRP1      |  | DDO        |
|          | DNAL1        |  | DDX3X      |
|          | FAM122C      |  | DDX3Y      |
|          | TIFA         |  | DDX43      |

|  |          |  |          |
|--|----------|--|----------|
|  | SLC39A1  |  | DDX46    |
|  | COPS8    |  | DDX52    |
|  | ARID3A   |  | DDX60    |
|  | SVIL     |  | DEFB132  |
|  | SRSF12   |  | DEK      |
|  | SPOPL    |  | DEPTOR   |
|  | MINOS1   |  | DGKE     |
|  | CLDN11   |  | DHX33    |
|  | AEBP2    |  | DIP2C    |
|  | PARK2    |  | DIS3L    |
|  | TRIT1    |  | DISC1    |
|  | RNF10    |  | DKC1     |
|  | HEYL     |  | DLGAP1   |
|  | SYT13    |  | DLGAP2   |
|  | PTGS2    |  | DLX1     |
|  | LOH12CR1 |  | DMRT3    |
|  | GIPC2    |  | DMXL2    |
|  | LARP6    |  | DNAH8    |
|  | AAK1     |  | DNAJC10  |
|  | GPX6     |  | DNM3     |
|  | PMEPA1   |  | DOCK7    |
|  | NOS1     |  | DOPEY2   |
|  | FAM196A  |  | DPY19L4  |
|  | IL17A    |  | DSC3     |
|  | LPP      |  | DSE      |
|  | PDGFRA   |  | DTX4     |
|  |          |  | DUSP3    |
|  |          |  | DYNC1LI2 |
|  |          |  | DYNLRB1  |
|  |          |  | E2F7     |
|  |          |  | EEA1     |
|  |          |  | EEF1A1   |
|  |          |  | EEF1E1   |
|  |          |  | EFHA2    |
|  |          |  | EIF1AX   |
|  |          |  | EIF4A2   |
|  |          |  | ELOVL2   |
|  |          |  | EML6     |
|  |          |  | EN2      |
|  |          |  | ENAH     |
|  |          |  | ENDOD1   |
|  |          |  | ENOX2    |
|  |          |  | ENTPD4   |
|  |          |  | EPG5     |

|  |  |  |          |
|--|--|--|----------|
|  |  |  | EPS8     |
|  |  |  | EREG     |
|  |  |  | ERLIN1   |
|  |  |  | ERMAP    |
|  |  |  | ESCO2    |
|  |  |  | EVI5     |
|  |  |  | EXD1     |
|  |  |  | EYS      |
|  |  |  | FAM102A  |
|  |  |  | FAM102B  |
|  |  |  | FAM104B  |
|  |  |  | FAM110C  |
|  |  |  | FAM117A  |
|  |  |  | FAM125B  |
|  |  |  | FAM133B  |
|  |  |  | FAM13B   |
|  |  |  | FAM160A1 |
|  |  |  | FAM179B  |
|  |  |  | FAM189B  |
|  |  |  | FAM190B  |
|  |  |  | FAM198B  |
|  |  |  | FAM24A   |
|  |  |  | FAM26D   |
|  |  |  | FAM46C   |
|  |  |  | FAM86A   |
|  |  |  | FAM86C1  |
|  |  |  | FAN1     |
|  |  |  | FANCF    |
|  |  |  | FANCM    |
|  |  |  | FASLG    |
|  |  |  | FAT3     |
|  |  |  | FBXL3    |
|  |  |  | FBXL5    |
|  |  |  | FBXO33   |
|  |  |  | FBXO34   |
|  |  |  | FBXO47   |
|  |  |  | FBXO5    |
|  |  |  | FBXW2    |
|  |  |  | FGF12    |
|  |  |  | FIGNL1   |
|  |  |  | FKBP4    |
|  |  |  | FLG2     |
|  |  |  | FLVCR1   |
|  |  |  | FMNL2    |

|  |  |  |        |
|--|--|--|--------|
|  |  |  | FNBP1  |
|  |  |  | FNDC3B |
|  |  |  | FNIP2  |
|  |  |  | FOXJ2  |
|  |  |  | FPR2   |
|  |  |  | FPR3   |
|  |  |  | FREM2  |
|  |  |  | FRMD7  |
|  |  |  | FUT9   |
|  |  |  | FYB    |
|  |  |  | FZD3   |
|  |  |  | FZD4   |
|  |  |  | GAB1   |
|  |  |  | GABRA1 |
|  |  |  | GALNT1 |
|  |  |  | GALNT3 |
|  |  |  | GATM   |
|  |  |  | GATS   |
|  |  |  | GBF1   |
|  |  |  | GBP1   |
|  |  |  | GCFC1  |
|  |  |  | GDA    |
|  |  |  | GDAP2  |
|  |  |  | GFPT1  |
|  |  |  | GHITM  |
|  |  |  | GIMAP1 |
|  |  |  | GK5    |
|  |  |  | GLYCK  |
|  |  |  | GNA12  |
|  |  |  | GNA14  |
|  |  |  | GOLGA3 |
|  |  |  | GOPC   |
|  |  |  | GORAB  |
|  |  |  | GPBP1  |
|  |  |  | GPC6   |
|  |  |  | GPCPD1 |
|  |  |  | GPR180 |
|  |  |  | GPR26  |
|  |  |  | GPR65  |
|  |  |  | GRAMD4 |
|  |  |  | GREM1  |
|  |  |  | GRIK2  |
|  |  |  | GRIN2A |
|  |  |  | GRM5   |



|  |  |  |          |
|--|--|--|----------|
|  |  |  | GSK3B    |
|  |  |  | GSTCD    |
|  |  |  | GTSE1    |
|  |  |  | GUCY1A3  |
|  |  |  | HAUS3    |
|  |  |  | HBS1L    |
|  |  |  | HECA     |
|  |  |  | HEG1     |
|  |  |  | HERPUD1  |
|  |  |  | HEY2     |
|  |  |  | HIGD2A   |
|  |  |  | HIPK2    |
|  |  |  | HK2      |
|  |  |  | HMGB2    |
|  |  |  | HNRNPC   |
|  |  |  | HOOK1    |
|  |  |  | HOOK3    |
|  |  |  | HPS5     |
|  |  |  | HS3ST3A1 |
|  |  |  | HS6ST1   |
|  |  |  | HSF2     |
|  |  |  | HSPA12A  |
|  |  |  | HSPA13   |
|  |  |  | HSPB3    |
|  |  |  | HTR2C    |
|  |  |  | ID4      |
|  |  |  | IFT74    |
|  |  |  | IFT80    |
|  |  |  | IFT81    |
|  |  |  | IGFBP3   |
|  |  |  | IL18R1   |
|  |  |  | IL1A     |
|  |  |  | ING1     |
|  |  |  | ING5     |
|  |  |  | INPP4A   |
|  |  |  | IPMK     |
|  |  |  | IQGAP1   |
|  |  |  | IREB2    |
|  |  |  | IRF5     |
|  |  |  | ITGB8    |
|  |  |  | ITLN1    |
|  |  |  | IYD      |
|  |  |  | JAZF1    |
|  |  |  | KAT2B    |
|  |  |  | KBTBD11  |
|  |  |  | KCNA1    |
|  |  |  | KCNA4    |

|  |  |  |              |
|--|--|--|--------------|
|  |  |  | KCNG3        |
|  |  |  | KCNJ1        |
|  |  |  | KCNQ5        |
|  |  |  | KCNS2        |
|  |  |  | KDM5A        |
|  |  |  | KDM5C        |
|  |  |  | KIAA0090     |
|  |  |  | KIAA1024     |
|  |  |  | KIAA1211     |
|  |  |  | KIAA1239     |
|  |  |  | KIAA1324L    |
|  |  |  | KIAA1407     |
|  |  |  | KIAA1456     |
|  |  |  | KIF3A        |
|  |  |  | KIN          |
|  |  |  | KITLG        |
|  |  |  | KL           |
|  |  |  | KLF6         |
|  |  |  | KLHL13       |
|  |  |  | KLHL24       |
|  |  |  | KLHL5        |
|  |  |  | KPNA4        |
|  |  |  | KRAS         |
|  |  |  | L3MBTL4      |
|  |  |  | LAMA1        |
|  |  |  | LAMA3        |
|  |  |  | LAMP2        |
|  |  |  | LARP4        |
|  |  |  | LCOR         |
|  |  |  | LCORL        |
|  |  |  | LCP1         |
|  |  |  | LEAP2        |
|  |  |  | LEPR         |
|  |  |  | LHFPL3       |
|  |  |  | LIFR         |
|  |  |  | LILRB3       |
|  |  |  | LIN54        |
|  |  |  | LMAN1        |
|  |  |  | LMO3         |
|  |  |  | LOC100505793 |
|  |  |  | LOC100507203 |
|  |  |  | LOC100507462 |
|  |  |  | LOC100509263 |
|  |  |  | LOC100653060 |
|  |  |  | LOC100653247 |
|  |  |  | LOC728392    |
|  |  |  | LOX          |

|  |  |  |            |
|--|--|--|------------|
|  |  |  | LPPR1      |
|  |  |  | LRAT       |
|  |  |  | LRRC58     |
|  |  |  | LRRC8D     |
|  |  |  | LRRFIP1    |
|  |  |  | LRRK2      |
|  |  |  | LZTFL1     |
|  |  |  | LY75-CD302 |
|  |  |  | LYPD6      |
|  |  |  | MAB21L3    |
|  |  |  | MAF        |
|  |  |  | MAGEB1     |
|  |  |  | MAGI1      |
|  |  |  | MAGI3      |
|  |  |  | MAL2       |
|  |  |  | MAOA       |
|  |  |  | MAP1B      |
|  |  |  | MAP7       |
|  |  |  | MAPK1      |
|  |  |  | MAPRE1     |
|  |  |  | MARC2      |
|  |  |  | MATN2      |
|  |  |  | MCM10      |
|  |  |  | MCM9       |
|  |  |  | MCTP2      |
|  |  |  | MCTS1      |
|  |  |  | MDFIC      |
|  |  |  | MDM4       |
|  |  |  | MED10      |
|  |  |  | MED9       |
|  |  |  | MEGF10     |
|  |  |  | MEGF9      |
|  |  |  | MEIS2      |
|  |  |  | MERTK      |
|  |  |  | METAP1     |
|  |  |  | METTLL10   |
|  |  |  | METTLL9    |
|  |  |  | MFAP3L     |
|  |  |  | MFSD8      |
|  |  |  | MGA        |
|  |  |  | MGAT5      |
|  |  |  | MIA2       |
|  |  |  | MKLN1      |
|  |  |  | MLL        |
|  |  |  | MLLT4      |
|  |  |  | MLLT6      |
|  |  |  | MOB1B      |

|  |  |  |          |
|--|--|--|----------|
|  |  |  | MPP7     |
|  |  |  | MPPED2   |
|  |  |  | MRGPRX2  |
|  |  |  | MRO      |
|  |  |  | MRPL13   |
|  |  |  | MRPL19   |
|  |  |  | MRPS14   |
|  |  |  | MRPS23   |
|  |  |  | MRPS9    |
|  |  |  | MSL2     |
|  |  |  | MSR1     |
|  |  |  | MTCH2    |
|  |  |  | MTF2     |
|  |  |  | MTHFD1L  |
|  |  |  | MTL5     |
|  |  |  | MTMR12   |
|  |  |  | MTX2     |
|  |  |  | MYBL1    |
|  |  |  | MYCN     |
|  |  |  | MYRIP    |
|  |  |  | MZT1     |
|  |  |  | NAALADL2 |
|  |  |  | NAP1L2   |
|  |  |  | NAPB     |
|  |  |  | NARG2    |
|  |  |  | NCEH1    |
|  |  |  | NCK2     |
|  |  |  | NCOA7    |
|  |  |  | NEBL     |
|  |  |  | NELL2    |
|  |  |  | NFAT5    |
|  |  |  | NFXL1    |
|  |  |  | NKIRAS1  |
|  |  |  | NLN      |
|  |  |  | NMT2     |
|  |  |  | NOL4     |
|  |  |  | NOLC1    |
|  |  |  | NPAS3    |
|  |  |  | NPTN     |
|  |  |  | NPTXR    |
|  |  |  | NR1D2    |
|  |  |  | NR3C1    |
|  |  |  | NRAS     |
|  |  |  | NRCAM    |
|  |  |  | NRXN1    |
|  |  |  | NRXN3    |
|  |  |  | NTM      |

|  |  |  |         |
|--|--|--|---------|
|  |  |  | NTS     |
|  |  |  | NUFIP1  |
|  |  |  | NXPH1   |
|  |  |  | OBFC1   |
|  |  |  | ONECUT2 |
|  |  |  | OR51E2  |
|  |  |  | OSBPL1A |
|  |  |  | OSBPL2  |
|  |  |  | OSBPL3  |
|  |  |  | OSBPL8  |
|  |  |  | OTUD1   |
|  |  |  | PABPC4L |
|  |  |  | PABPC5  |
|  |  |  | PAG1    |
|  |  |  | PAK7    |
|  |  |  | PAN3    |
|  |  |  | PAPD5   |
|  |  |  | PARK2   |
|  |  |  | PAWR    |
|  |  |  | PAX6    |
|  |  |  | PBX1    |
|  |  |  | PBX3    |
|  |  |  | PCBP1   |
|  |  |  | PCDH11X |
|  |  |  | PCDH11Y |
|  |  |  | PCDH20  |
|  |  |  | PCGF3   |
|  |  |  | PCYOX1  |
|  |  |  | PCSK1   |
|  |  |  | PDAP1   |
|  |  |  | PDE3B   |
|  |  |  | PDE5A   |
|  |  |  | PDIA6   |
|  |  |  | PDIK1L  |
|  |  |  | PDK2    |
|  |  |  | PDP1    |
|  |  |  | PDS5B   |
|  |  |  | PDXDC1  |
|  |  |  | PEAK1   |
|  |  |  | PEG10   |
|  |  |  | PEL1    |
|  |  |  | PER3    |
|  |  |  | PEX3    |
|  |  |  | PF4V1   |
|  |  |  | PGAP1   |
|  |  |  | PGBD1   |
|  |  |  | PGR     |

|  |  |  |          |
|--|--|--|----------|
|  |  |  | PHC3     |
|  |  |  | PHIP     |
|  |  |  | PHLPP2   |
|  |  |  | PI4K2B   |
|  |  |  | PIP4K2C  |
|  |  |  | PJA2     |
|  |  |  | PKD2     |
|  |  |  | PLA2G4A  |
|  |  |  | PLAC8    |
|  |  |  | PLAG1    |
|  |  |  | PLEKHA8  |
|  |  |  | PLG      |
|  |  |  | PMPCB    |
|  |  |  | POLI     |
|  |  |  | POLR3G   |
|  |  |  | POSTN    |
|  |  |  | POU2F1   |
|  |  |  | PPA1     |
|  |  |  | PPARGC1B |
|  |  |  | PPP1CB   |
|  |  |  | PPP1R12B |
|  |  |  | PPP1R3C  |
|  |  |  | PPP1R3D  |
|  |  |  | PPP1R9A  |
|  |  |  | PPP3R1   |
|  |  |  | PRDX3    |
|  |  |  | PRKAA2   |
|  |  |  | PRKAR2B  |
|  |  |  | PRKG1    |
|  |  |  | PROCR    |
|  |  |  | PRPF4B   |
|  |  |  | PRRC1    |
|  |  |  | PRRG4    |
|  |  |  | PRTG     |
|  |  |  | PSG11    |
|  |  |  | PSG3     |
|  |  |  | PSG5     |
|  |  |  | PSG9     |
|  |  |  | PSIP1    |
|  |  |  | PSMC2    |
|  |  |  | PSPC1    |
|  |  |  | PTAR1    |
|  |  |  | PTBP3    |
|  |  |  | PTEN     |
|  |  |  | PTGER3   |
|  |  |  | PTGS2    |
|  |  |  | PTPDC1   |

|  |  |  |          |
|--|--|--|----------|
|  |  |  | PTPN3    |
|  |  |  | PTPRB    |
|  |  |  | PTPRD    |
|  |  |  | PWWP2A   |
|  |  |  | QDPR     |
|  |  |  | QKI      |
|  |  |  | RAB11A   |
|  |  |  | RAB27A   |
|  |  |  | RAB3IP   |
|  |  |  | RABGEF1  |
|  |  |  | RABGGTB  |
|  |  |  | RABL3    |
|  |  |  | RAD21    |
|  |  |  | RAD51AP1 |
|  |  |  | RAP2A    |
|  |  |  | RAPH1    |
|  |  |  | RASAL2   |
|  |  |  | RASSF10  |
|  |  |  | RASSF8   |
|  |  |  | RBBP7    |
|  |  |  | RBFOX1   |
|  |  |  | RBM18    |
|  |  |  | RBM26    |
|  |  |  | RBM38    |
|  |  |  | RBM4     |
|  |  |  | RBM44    |
|  |  |  | RBM47    |
|  |  |  | REEP1    |
|  |  |  | REPS2    |
|  |  |  | REST     |
|  |  |  | RFTN2    |
|  |  |  | RGPD3    |
|  |  |  | RGS18    |
|  |  |  | RHOQ     |
|  |  |  | RIMKLA   |
|  |  |  | RIOK2    |
|  |  |  | RIT1     |
|  |  |  | RNF125   |
|  |  |  | RNF13    |
|  |  |  | RNF144B  |
|  |  |  | RNF2     |
|  |  |  | RNF6     |
|  |  |  | RNF7     |
|  |  |  | RORA     |
|  |  |  | RPAP2    |
|  |  |  | RPAP3    |
|  |  |  | RPE65    |

|  |  |  |          |
|--|--|--|----------|
|  |  |  | RPS6KA5  |
|  |  |  | RRAGA    |
|  |  |  | RRAGD    |
|  |  |  | RRP15    |
|  |  |  | RSBN1    |
|  |  |  | RSPO2    |
|  |  |  | RTF1     |
|  |  |  | RTKN2    |
|  |  |  | RTN1     |
|  |  |  | RUFY2    |
|  |  |  | RUFY3    |
|  |  |  | RUNDC3B  |
|  |  |  | S1PR1    |
|  |  |  | SAMD4A   |
|  |  |  | SAMD8    |
|  |  |  | SC5DL    |
|  |  |  | SCAI     |
|  |  |  | SCAMP1   |
|  |  |  | SCAPER   |
|  |  |  | SCD5     |
|  |  |  | SCHIP1   |
|  |  |  | SCN9A    |
|  |  |  | SCOC     |
|  |  |  | SCP2     |
|  |  |  | SDAD1    |
|  |  |  | SEL1L    |
|  |  |  | SELT     |
|  |  |  | SEMA3E   |
|  |  |  | SEMA5A   |
|  |  |  | SEN7     |
|  |  |  | SERPINB5 |
|  |  |  | SERPINI1 |
|  |  |  | SF3B1    |
|  |  |  | SGCB     |
|  |  |  | SGPP1    |
|  |  |  | SH3GLB1  |
|  |  |  | SH3TC2   |
|  |  |  | SHE      |
|  |  |  | SHISA9   |
|  |  |  | SHQ1     |
|  |  |  | SIAE     |
|  |  |  | SIAH3    |
|  |  |  | SIRT1    |
|  |  |  | SKA2     |
|  |  |  | SKAP2    |
|  |  |  | SLAIN2   |
|  |  |  | SLC10A7  |



|  |  |  |            |
|--|--|--|------------|
|  |  |  | SLC11A1    |
|  |  |  | SLC13A3    |
|  |  |  | SLC16A2    |
|  |  |  | SLC16A6    |
|  |  |  | SLC24A4    |
|  |  |  | SLC25A21   |
|  |  |  | SLC25A40   |
|  |  |  | SLC26A2    |
|  |  |  | SLC28A3    |
|  |  |  | SLC2A13    |
|  |  |  | SLC2A3     |
|  |  |  | SLC30A10   |
|  |  |  | SLC30A5    |
|  |  |  | SLC35F1    |
|  |  |  | SLC38A1    |
|  |  |  | SLC38A4    |
|  |  |  | SLC39A12   |
|  |  |  | SLC44A5    |
|  |  |  | SLC5A3     |
|  |  |  | SLC7A11    |
|  |  |  | SMAD2      |
|  |  |  | SMAD5      |
|  |  |  | SMC4       |
|  |  |  | SMC6       |
|  |  |  | SMCHD1     |
|  |  |  | SMG1       |
|  |  |  | SNAPC3     |
|  |  |  | SNRNP48    |
|  |  |  | SNTN       |
|  |  |  | SNX1       |
|  |  |  | SNX13      |
|  |  |  | SNX30      |
|  |  |  | SOBP       |
|  |  |  | SOCS4      |
|  |  |  | SORD       |
|  |  |  | SP100      |
|  |  |  | SP3        |
|  |  |  | SPAG9      |
|  |  |  | SPATA5     |
|  |  |  | SPG21      |
|  |  |  | SPTLC1     |
|  |  |  | SPTLC3     |
|  |  |  | SRFBP1     |
|  |  |  | SRSF10     |
|  |  |  | SS18L1     |
|  |  |  | SSR1       |
|  |  |  | ST6GALNAC3 |

|  |  |  |            |
|--|--|--|------------|
|  |  |  | ST6GALNAC5 |
|  |  |  | ST8SIA3    |
|  |  |  | STK17B     |
|  |  |  | STK24      |
|  |  |  | STRBP      |
|  |  |  | STRN       |
|  |  |  | STXBP4     |
|  |  |  | SUGP2      |
|  |  |  | SYNE1      |
|  |  |  | SYTL4      |
|  |  |  | TADA1      |
|  |  |  | TAF5       |
|  |  |  | TBC1D1     |
|  |  |  | TCERG1     |
|  |  |  | TCF4       |
|  |  |  | TET2       |
|  |  |  | TEX2       |
|  |  |  | TFDP1      |
|  |  |  | TFRC       |
|  |  |  | TGFBI      |
|  |  |  | THUMPD1    |
|  |  |  | TIAL1      |
|  |  |  | TIFA       |
|  |  |  | TJP2       |
|  |  |  | TLL1       |
|  |  |  | TMCC3      |
|  |  |  | TMEM106B   |
|  |  |  | TMEM133    |
|  |  |  | TMEM135    |
|  |  |  | TMEM167B   |
|  |  |  | TMEM181    |
|  |  |  | TMEM185A   |
|  |  |  | TMEM196    |
|  |  |  | TMEM202    |
|  |  |  | TMEM203    |
|  |  |  | TMEM229A   |
|  |  |  | TMEM87B    |
|  |  |  | TMF1       |
|  |  |  | TMOD3      |
|  |  |  | TMPRSS11D  |
|  |  |  | TMTC2      |
|  |  |  | TNFSF10    |
|  |  |  | TNFSF11    |
|  |  |  | TNKS       |
|  |  |  | TNPO1      |
|  |  |  | TNS3       |
|  |  |  | TOR1AIP2   |

|  |  |  |          |
|--|--|--|----------|
|  |  |  | TOX      |
|  |  |  | TP53INP1 |
|  |  |  | TP63     |
|  |  |  | TPM3     |
|  |  |  | TRAK2    |
|  |  |  | TRAPPC6B |
|  |  |  | TRDMT1   |
|  |  |  | TRDN     |
|  |  |  | TRIM13   |
|  |  |  | TRIM2    |
|  |  |  | TRIM39   |
|  |  |  | TRIM61   |
|  |  |  | TRIM9    |
|  |  |  | TRIP11   |
|  |  |  | TRMT2A   |
|  |  |  | TRPC1    |
|  |  |  | TRPS1    |
|  |  |  | TTC19    |
|  |  |  | TWF1     |
|  |  |  | TWIST1   |
|  |  |  | TWISTNB  |
|  |  |  | TXLNA    |
|  |  |  | TXLNB    |
|  |  |  | UBA6     |
|  |  |  | UBR3     |
|  |  |  | UBXN10   |
|  |  |  | UBXN2B   |
|  |  |  | UCHL5    |
|  |  |  | UFD1L    |
|  |  |  | UNC13C   |
|  |  |  | UNKL     |
|  |  |  | UPB1     |
|  |  |  | USP45    |
|  |  |  | USP46    |
|  |  |  | USP53    |
|  |  |  | UTP23    |
|  |  |  | UTY      |
|  |  |  | VANGL1   |
|  |  |  | VAX1     |
|  |  |  | VBP1     |
|  |  |  | VGLL3    |
|  |  |  | VIP      |
|  |  |  | VSIG10   |
|  |  |  | VTA1     |
|  |  |  | VTI1A    |
|  |  |  | WASF1    |
|  |  |  | WASL     |

|  |  |  |         |
|--|--|--|---------|
|  |  |  | WHAMM   |
|  |  |  | WHSC1   |
|  |  |  | WNK3    |
|  |  |  | WNT16   |
|  |  |  | WWTR1   |
|  |  |  | YOD1    |
|  |  |  | YTHDC1  |
|  |  |  | ZBTB24  |
|  |  |  | ZBTB33  |
|  |  |  | ZBTB34  |
|  |  |  | ZBTB43  |
|  |  |  | ZBTB44  |
|  |  |  | ZC3H6   |
|  |  |  | ZCCHC14 |
|  |  |  | ZDHHC17 |
|  |  |  | ZDHHC21 |
|  |  |  | ZDHHC3  |
|  |  |  | ZFAND4  |
|  |  |  | ZFAND5  |
|  |  |  | ZFHX4   |
|  |  |  | ZFP91   |
|  |  |  | ZFX     |
|  |  |  | ZIC2    |
|  |  |  | ZNF148  |
|  |  |  | ZNF264  |
|  |  |  | ZNF277  |
|  |  |  | ZNF280D |
|  |  |  | ZNF295  |
|  |  |  | ZNF320  |
|  |  |  | ZNF345  |
|  |  |  | ZNF367  |
|  |  |  | ZNF398  |
|  |  |  | ZNF436  |
|  |  |  | ZNF483  |
|  |  |  | ZNF512  |
|  |  |  | ZNF518B |
|  |  |  | ZNF519  |
|  |  |  | ZNF544  |
|  |  |  | ZNF594  |
|  |  |  | ZNF598  |
|  |  |  | ZNF644  |
|  |  |  | ZNF649  |
|  |  |  | ZNF654  |
|  |  |  | ZNF675  |
|  |  |  | ZNF704  |
|  |  |  | ZNF720  |
|  |  |  | ZNF737  |

|  |  |  |        |
|--|--|--|--------|
|  |  |  | ZNF74  |
|  |  |  | ZNF793 |
|  |  |  | ZNF814 |
|  |  |  | ZNF879 |
|  |  |  | ZRANB2 |
|  |  |  | ZXDC   |
|  |  |  | ZZZ3   |
|  |  |  | ZSWIM2 |
